# 1 **A Chemoenzymatic Method for Glycoproteomic N-glycan** 2 **Type Quantitation**

3 Henghui Li<sup>1</sup>, Leyuan Li<sup>1</sup>, Kai Cheng<sup>1</sup>, Zhibin Ning<sup>1</sup>, Janice Mayne<sup>1</sup>, Xu Zhang<sup>1</sup>, Krystal Walker<sup>1</sup>,  
4 Rui Chen<sup>3</sup>, Susan Twine<sup>3</sup>, Jianjun Li<sup>3</sup>, Daniel Figeys<sup>1,2\*</sup>

5

6 <sup>1</sup> *SIMM-University of Ottawa Joint Research Center in Systems and Personalized Pharmacology*  
7 *and Ottawa Institute of Systems Biology and Department of Biochemistry, Microbiology and*  
8 *Immunology, Faculty of Medicine, University of Ottawa, 451 Smyth Road, Ottawa, ON, K1H 8M5,*  
9 *Canada.*

10 <sup>2</sup> *Molecular Architecture of Life Program, Canadian Institute for Advanced Research, Toronto,*  
11 *Canada.*

12 <sup>3</sup> *Human Health Therapeutics Research Centre, National Research Council Canada, Ottawa, ON,*  
13 *Canada.*

14

15

16

17

18

19

---

20 \*Corresponding authors

21 <sup>4</sup> *Ottawa Institute of Systems Biology and Department of Biochemistry, Microbiology and*  
22 *Immunology, Faculty of Medicine, University of Ottawa, 451 Smyth Road, Ottawa, ON, K1H 8M5,*  
23 *Canada. [dfigeys@uottawa.ca](mailto:dfigeys@uottawa.ca).*

24

25

26

27

28

29 **ABSTRACT**

30 Glycosylation is one of the most important post-translational modifications in biological systems.  
31 Current glycoproteome methods mainly focus on qualitative identification of glycosylation sites or intact  
32 glycopeptides. However, the systematic quantitation of glycoproteins has remained largely unexplored.  
33 Here, we developed a chemoenzymatic method to quantitatively investigate N-glycoproteome based on  
34 the N-glycan types. Taking advantage of the specificity of different endoglycosidases and isotope  
35 dimethyl labeling, six N-glycan types of structures linked on each glycopeptide, including high-  
36 mannose/hybrid, bi-antennary and tri-antennary with/without core fucose, were quantified. As a proof of  
37 principle, the glycoproteomic N-glycan type quantitative (glyco-TQ) method was first used to determine  
38 the N-glycan type composition of immunoglobulin G1 (IgG1) Fc fragment. Then we applied the method  
39 to analyze the glycan type profile of proteins in the breast cancer cell line MCF7, and quantitatively  
40 revealed the N-glycan type micro-heterogeneity at both the glycopeptide and glycoprotein levels. The  
41 novel quantitative strategy to evaluate the relative intensity of the six states of N-glycan type  
42 glycosylation on each site provides a new avenue to investigate function of glycoproteins in broad areas,  
43 such as cancer biomarker research, pharmaceuticals characterization and anti-glycan vaccine  
44 development.

45

46 **Keywords:** endoglycosidase; N-glycan; glycoproteomic; quantitation; isotope dimethyl labeling

47

## 48 INTRODUCTION

49 Glycosylation is one of the most common post-translational modifications (PTM)<sup>1</sup>. Glycans exhibit  
50 vast structural microheterogeneity which is mainly generated by variable glycan structures at each of  
51 their specific glycosylation sites. The N-linked glycans are generally attached to the Asn at Asn-X-  
52 Ser/Thr consensus sequence, where X is any amino acid other than Pro<sup>2</sup>. The biosynthesis of N-linked  
53 glycoproteins is under a complex sequence of enzymatically catalyzed events, leading to a variety of  
54 diverse N-glycan structures. The diverse N-glycan structures are generally classified into three types:  
55 high mannose, hybrid, and complex type glycans, with all N-glycans sharing a common penta-saccharide  
56 (GlcNAc<sub>2</sub>Man<sub>3</sub>) core structure<sup>3</sup>. Although the structure of glycan is variable, evidence shows that the  
57 mammalian glycans are remarkably well conserved in certain organisms, expressing a distinct array of  
58 glycan profiles under defined conditions<sup>4</sup>.

59 Mass spectrometry (MS) is a powerful platform to comprehensively analyze protein glycosylation.  
60 However, due to the low abundance of glycosylated peptides and the heterogeneity of glycan structures,  
61 N-glycopeptide enrichment is required. Several enrichment methods have been reported, including  
62 lectin<sup>5</sup> and hydrazide chemistry-based methods<sup>6,7</sup>, boronic acid enrichment<sup>8</sup>, hydrophilic interaction  
63 liquid chromatography (HILIC)<sup>9</sup> and metabolic labeling<sup>10,11</sup>. In general, these strategies for detecting N-  
64 linked glycosylated sites require an additional de-glycosylation step by N-glycosidase F (PNGase F)  
65 before MS detection<sup>5-7</sup>. Unfortunately, this results in the loss of the glycan structure information at the  
66 glycosylated sites as the glycans are removed from the peptides.

67 Recently, a site-specific glycoproteomic method was used to detect intact glycopeptide by MS with a  
68 variety of tandem MS techniques<sup>10,12-14</sup>. This strategy allows the simultaneous detection of glycopeptide  
69 sequence, glycosylation site and glycan structures in one MS/MS spectrum. Current state-of-the-art MS  
70 technology with multiple dissociation known as activated ion electron transfer dissociation methods (AI-  
71 ETD) allowed intact glycoproteomic identification of more than one thousand (~1500) intact N-  
72 glycopeptides from a mouse brain tissue<sup>13</sup>. The site-specific glycoproteomic strategies have been applied  
73 to quantitatively detect glycoprotein alteration using the isotope labeling<sup>12</sup>, isobaric labeling strategies<sup>15</sup>  
74 and labeling-free method<sup>16</sup>. However, due to missed detection of low abundant glycan structures, more  
75 than half of identified glycopeptides were linked with only one or two glycan structures using the intact  
76 glycopeptide method, hindering the comprehensive quantitation in complex biological samples<sup>13</sup>.

77 The diverse N-glycan structures play important roles in many key biological processes, including cell

78 adhesion, receptor activation, molecular trafficking, signal transduction and disease progression, and  
79 immunotherapy<sup>17,18</sup>. Some apparent changes associated with cancers are the overexpression of sialylation  
80 and core fucosylation, and complex branched N-glycans. For example, increased core fucosylated type  
81 of N-glycan is an important signature of several cancers, such as hepatocellular carcinoma<sup>19</sup>, lung  
82 cancer<sup>20</sup> and breast cancer<sup>21</sup>. Therefore, quantitatively monitoring the N-glycan type changes in  
83 glycosylation are important for the diagnosis, prognosis, and understanding molecular mechanisms  
84 involved in pathogenesis. Cao L et al. introduced a MS-based method that used two glycosidases  
85 PNGase F and endoglycosidase H (Endo-H), to assess the site occupancy and proportion of high-  
86 mannose and complex-type glycans of purified human immunodeficiency virus (HIV) envelope (Env)  
87 glycoprotein<sup>22</sup>. The NMR-based strategy was introduced to allow dissecting the glycan pattern of  
88 the IgE high-affinity receptor (FcεRIα), presenting of pauci-mannose, high-mannose, hybrid, and  
89 bi-, tri-, and tetra-antennary complex type N-glycans with different degrees of fucosylation and  
90 sialylation<sup>23</sup>. A purification step of glycoprotein is required in these methods, therefore, glycan type  
91 quantitation at the proteome level is urgently needed for complex biological samples.

92 To fulfill this analytical challenge, we developed a robust chemoenzymatic based method that  
93 quantitatively determined the proportion of N-glycan types at each glycopeptide. Briefly, three aliquots  
94 of trypsin proteolyzed sample are treated in parallel with three specific endoglycosidases and the aliquots  
95 are isotopically labeled using the three plex dimethyl labeling strategy and then combined. The cleaved  
96 N-glycopeptides are biotinylated and enriched by affinity chromatography, and the eluted N-  
97 glycopeptides are analyzed by MS. The glycoproteomic N-glycan type quantitative (Glyco-TQ) strategy  
98 was first applied on the standard glycoprotein IgG1 Fc fragment and further used to comprehensively  
99 investigate glycopeptides from the MCF7 breast cancer cell line. The data interpretation is convenient  
100 and compatible with the general proteomic platform, without need of laboriously generating sample-  
101 specific spectral libraries, complex data filtering process or specialized commercial data analysis tools.  
102 The result showed that the novel strategy could provide quantitative information on important  
103 characteristic of glycoproteins, including the relative proportion of high-mannose and linkage-related  
104 complex type glycan, and proportion of non-fucosylated and core fucosylated type glycan at each  
105 glycosylated site. To our knowledge, this is the first report to quantify the proportion of N-glycan types  
106 on the glycopeptides using the data-dependent acquisition mode for a complex biological sample.

107

## 108 RESULTS

109 We developed a method for the quantitative analysis of N-glycan type micro-heterogeneity at both  
110 glycopeptide and glycoprotein levels. The method includes the following steps (Fig. 1a): (i) the trypsin  
111 proteolyzed peptides were divided into three aliquots, treated with one of three endoglycosidase (H, S  
112 and F3), and incubated with  $\beta$ -N-acetylhexosaminidase<sub>r</sub> to remove O-linked N-acetylglucosamines (O-  
113 GlcNAc); Endoglycosidase H (Endo-H) releases high mannose and hybrid type N-glycans, including  
114 those that have a fucose residue attached to the core structure<sup>24</sup>; endoglycosidase S (Endo-S) releases bi-  
115 antennary complex type glycans<sup>25</sup>; and endoglycosidase F3 (Endo-F3) release core fucosylated bi-  
116 antennary complex type glycan and tri-antennary complex glycan from N-glycopeptides<sup>26</sup> (ii) the three  
117 aliquots were dimethyl labeled with ‘light’ isotope for Endo-H treated peptides, ‘intermediate’ isotope  
118 for Endo-S treated peptides and ‘heavy’ isotope for Endo-F3 treated peptides, respectively; (iii) the  
119 aliquots were combined and the retained GlcNAc on the N-glycopeptide was further transformed with  
120 N-azidoacetylgalactosamine (GalNAz) through the catalysis of  $\beta$ -1,4-galactosyltransferase Y289L  
121 (GalT1 Y298L); (iv) the GalNAz labeled N-glycopeptides were covalently reacted with the  
122 photocleavable (PC) alkyne biotin through the copper(I)-catalyzed azide-alkyne cycloaddition (CuAAC)  
123 reaction; (v) the biotin linked peptides were enriched by high capacity streptavidin agarose affinity  
124 chromatography. The non-glycopeptide and reagents were removed through extensively washing; (vi)  
125 the N-glycopeptides were released by 365 nm ultraviolet irradiation and detected by MS. The detailed  
126 schematic for the PC alkyne biotin structure and reaction procedure is shown in Supplementary Fig. 1.

127 We have tested different endoglycosidases for their specificity and selected three endoglycosidases for  
128 our method. To evaluate the specificity of the selected endoglycosidases, glycopeptides from MCF7 cells  
129 were incubated with Endo-H, Endo-S and Endo-F3, respectively. The released glycans were collected,  
130 labeled with procainamide through reductive amination and analyzed by nano LC-MS. The result showed  
131 that five high mannose and four hybrid N-glycans could be released by Endo-H (Supplementary Fig. 2a).  
132 The substrates for Endo-S were all bi-antennary complex glycans (Supplementary Fig. 2b). The Endo-  
133 F3 released the non-fucosylated tri-antennary and core fucosylated bi/tri-antennary glycans  
134 (Supplementary Fig. 2c). However, bisected bi-antennary structures with/without core fucose were not  
135 substrates for Endo-F3 (Supplementary Fig. 3). None of these three endoglycosidases showed any  
136 activity towards the more complex tetra-antennary structures. The detailed information of  
137 endoglycosidase specificity is listed in Supplementary Table 1. Therefore, using the three

138 endoglycosidases in our method, the quantitative assessment of six N-glycan types at glycopeptides was  
139 achieved and the six types of N-glycan were classified as following: non-fucosylated high  
140 mannose/hybrid, non-fucosylated bi-antennary, non-fucosylated tri-antennary, core fucosylated high  
141 mannose/hybrid, core fucosylated bi-antennary and core fucosylated bi/tri-antennary type glycans (Fig.  
142 1b).

143 Our method also includes a novel enrichment strategy. Previously, GalT1 Y298L was used to label the  
144 O-linked  $\beta$ -N-acetylglucosamine (GlcNAc) glycopeptide with GalNAz<sup>27</sup>. We discovered that the GalT1  
145 Y298L could effectively label the N-GlcNAc (on average 95.3%) as shown in Supplementary Fig. 4.  
146 After the N-linked glycopeptides were modified with GalNAz, and covalently linked with  
147 photocleavable biotin through click reaction, the unlabeled peptides and other reagents were removed by  
148 extensive washing with urea and organic buffer. The PC biotin alkyne was selected for our method  
149 development because ultraviolet irradiation is a milder condition to release the labeled glycopeptides,  
150 when compared with chemical methods that use strong reductive hydrazine or oxidizing reagents<sup>28</sup>.  
151 Irradiation with 365 nm ultraviolet light efficiently recovered glycopeptides from the agarose streptavidin  
152 beads, with almost all glycopeptide released within 15 min (Supplementary Fig. 5).

### 153 **Validating the Glyco-TQ method on the standard glycoprotein IgG1 Fc**

154 We first tested our approach using an immunoglobulin G1 (IgG1), containing one fragment  
155 crystallizable region (Fc fragments) and antigen-binding fragments (F(ab')<sub>2</sub> fragment). It has one fixed  
156 N-glycosylated site at Asn297 of the Fc fragment while glycan occupancy on the F(ab')<sub>2</sub> fragments are  
157 reported to be near 20%<sup>29</sup>. To obtain one standard N-glycoprotein with one fixed glycosylated site, IgG1  
158 from human serum was treated with IdeS protease, to generate a homogenous pool of F(ab')<sub>2</sub> and Fc/2  
159 fragments and then the Fc fragments were enriched by protein A agarose chromatography (Fig. 2a). As  
160 proof of principle for our quantitative method, the proportion of each glycan type was investigated by  
161 both matrix-assisted laser desorption/ionization-MS (MALDI-MS) and our novel Glyco-TQ method. The  
162 N-glycan spectrum of the Fc fragment was interrogated by MALDI-MS detection in Fig. 2b. The  
163 proportion of different types of N-glycans was calculated through the peak intensity of each glycan  
164 structure based on the MALDI-MS spectrum. The detailed ratio information of each structure is shown  
165 in Supplementary Table 2 for the MALDI-MS detection. For Glyco-TQ method, glycopeptides with  
166 sequence EEQYN#STYR were classified into six types based on their linked glycan structure: non-  
167 fucosylated high mannose/hybrid type, non-fucosylated bi-antennary type, non-fucosylated tri-antennary

168 type, core fucosylated high mannose/hybrid type, core fucosylated bi-antennary type and core  
169 fucosylated bi/tri-antennary type glycan. The MS spectra of enriched glycopeptides and their  
170 corresponding extracted-ion chromatograms are shown in the Fig. 2c. The comparison of the proportion  
171 of glycan types based upon our Glyco-TQ method and MALDI-MS detection is shown in Fig. 2d. The  
172 high mannose and hybrid glycan type was not detected using either methods, showing the high specificity  
173 of Endo-H. As for the bi-antennary glycans released by Endo-S, the proportion of the core fucosylated  
174 bi-antennary glycan is 93.9% using our Glyco-TQ method and 90.5% using MALDI-MS detection; the  
175 proportion of the non-fucosylated bi-antennary is 6.1% using our Glyco-TQ method versus 9.5% using  
176 MALDI-MS detection. The proportion of the core fucosylated bi-antennary from our method is higher  
177 than using MALDI-MS detection (93.9% versus 90.5%), which may be due to their different ionization  
178 modes. The Endo-F3 did not release the core fucosylated bisecting bi-antennary glycans and non-  
179 fucosylated bi-antennary type glycans (showing only with minor activity when compared with tri-  
180 antennary glycans) (Supplementary Fig. 4)<sup>30</sup>. Only 3.3% of non-fucosylated glycans were released by  
181 the Endo-F3 in these experiments. In conclusion, our Glyco-TQ method quantitatively revealed glycan  
182 type and linkage of IgG1 Fc.

### 183 **Identification of N-glycopeptides from MCF7 cells**

184 **Detection of endogenous and native N-linked GlcNAc glycopeptides.** Similar to endoglycosidases,  
185 Endo- $\beta$ -N-acetylglucosaminidase (ENGase) acts as a de-glycosylation enzyme for the misfolding  
186 proteins in the cytosol<sup>31</sup>. We first applied our enrichment method to enrich the endogenously and native  
187 existing N-linked GlcNAc glycopeptides from MCF7 total cell lysates in absence of added any  
188 endoglycosidase (Supplementary Fig. 6). Our enrichment strategy yielded 71 N-linked glycopeptides  
189 that mapped to consensus N-glycosylated sequences (Asn-X-Ser-Thr-Cys) and that were detected with  
190 modification of one N-linked GlcNAc residue (peptide-GlcNAc) (Supplementary Table 3). At the same  
191 time, we also detected 63 O-linked GlcNAc modified peptides, which are located in the nucleus and  
192 cytoplasm by gene ontology (GO) analysis (Supplementary Table 4). Caution should be taken when  
193 interpreting results since  $\beta$ -N-Acetylhexosaminidase<sub>f</sub> couldn't fully remove some abundant O-linked  
194 GlcNAc modifications.

195 **Detection of N-glycopeptides from MCF7 cells.** To verify our enrichment strategy, we applied the  
196 three endoglycosidases (H, S, F3) to help us enrich all the high mannose, hybrid, bi- and tri-antennary  
197 complex linked glycopeptides (Supplementary Fig. 7). To evaluate the reproducibility of our enrichment

198 method, we performed three biological replicates with MCF-7 protein cell lysates and found 73%  
199 glycopeptides were identified in at least two replicates (Supplementary Fig. 8). We compared the  
200 glycopeptide and non-glycopeptide fractions in each parallel replicate, and showed that the specificity of  
201 our method is 55.4%. Our performance was better than the specificity of previously boronic acid and  
202 ZIC-HILIC enrichment method<sup>8</sup>. After N-glycan was released by the endoglycosidase, the core fucose  
203 was retained on the core GlcNAc residue, which allowed us to simultaneously distinguish the non-  
204 fucosylated and core fucosylated peptides. In total, 1090 N-glycopeptides were detected, including 916  
205 non-fucosylated and 174 core fucosylated glycopeptide, corresponding to 504 glycoproteins  
206 (Supplementary Table 5). There were 116 glycopeptides with co-occurrence of the non-fucosylated and  
207 core fucosylated glycopeptides (Supplementary Fig. 9). As well, 58 glycopeptides were detected with  
208 only core fucosylated type glycans. Amino acid frequencies of sequences surrounding the N-glycosylated  
209 site are shown in Supplementary Fig. 10 for both the canonical and atypical N-linked glycopeptides. The  
210 above was carried out using the stepped fragmentation strategy. When the normalized collision energy  
211 (NCE) was set to 15, the fuc-GlcNAc linkage was prone to cleavage, which resulted in the parent ion  
212 and fucose neutral loss-ion as the highest peaks (Supplementary Fig. 11). For example, one MS/MS  
213 spectrum of atypical motif glycopeptide with sequence ISVN#NVLPVFDNLMQQK was identified with  
214 one core fucose as shown in the Fig. 3. In addition, the glycopeptides with common glycan tag (GlcNAc-  
215 GalNAzPct) allowed help us to identify the glycopeptides with two glycosylated sites (Supplementary  
216 Fig. 12), overcoming significant challenges posed for their identification when using the intact  
217 glycopeptide method (5-7 KDa)<sup>32</sup>.

## 218 **Applying the Glyco-TQ method to analyze glycopeptides of MCF7 cell line**

219 **Quantitative micro-heterogeneity of glycopeptides and glycoproteins.** The chemoenzymatic  
220 strategy allowed us to quantify the N-linked glycan dynamics on specific glycopeptide. After the peptides  
221 were treated with Endo-H, S and F3, we combined and enriched the glycopeptides by affinity  
222 chromatography (Fig. 1a). Relative quantitation of isotope peaks was calculated using the intensity of  
223 each peak area, which represented the proportion of each glycan type on the glycopeptide. First, we  
224 evaluated whether the different endoglycosidases treatment introduced biases during the glycan releasing  
225 steps. As show in Supplementary Fig. 13, high values from correlation coefficients (the value of  
226 Pearson's correlation coefficient  $r > 0.96$ ) were observed between the different endoglycosidase  
227 treatment after isotope labeling. Thus, we concluded that the endoglycosidase did not exhibit off-target



228 protease activity and so did not introduce sample bias during glycan releasing steps. In total, we  
229 quantitatively detected 698 peptides that mapped to 378 proteins. All the glycopeptides and the relative  
230 ratio of each glycan type are shown in Supplementary Table 6. Almost all the non-fucosylated  
231 glycopeptides (> 97%) linked with the high-mannose or hybrid glycans (Fig. 4a), while only 2  
232 glycopeptides were linked with core fucosylated hybrid glycan and more than 97% core fucosylated  
233 peptides were linked with bi- and tri-antennary complex glycans (Fig. 4b). The quantitative results  
234 exhibit distinct expression profiles for six glycan types on the glycopeptide as shown in the Fig. 4c,  
235 highlighting the abundant expression of non-fucosylated high-mannose and hybrid N-glycan. We use the  
236 heatmap to show the quantitative micro-heterogeneity of glycopeptide, and relative distribution of glycan  
237 type present on the particular glycosylated site (Fig. 4d-f). For the non-fucosylated glycopeptide, 143  
238 glycopeptides were only linked with high-mannose and hybrid type glycan (Fig. 4d). Non-fucosylated  
239 glycopeptides (86.3%) were linked with high-mannose and hybrid type glycan, of which their proportion  
240 is larger than 50% (Supplementary Table 6 and Fig. 4d). Consistent with previous report, our results  
241 showed that N-glycans from the MCF7 cell line were predominant of non-fucosylated high-  
242 mannose/hybrid type glycans<sup>33</sup>. That is expected as all of the glycoproteins were first linked with high  
243 mannose type glycan during the biosynthesis<sup>34</sup>. As for the quantitative micro-heterogeneity on the protein  
244 level, we studied internal connection of different glycopeptides from the same glycoprotein (Fig. 4g-i).  
245 The distance between the connected dots represents the glycan type expressing divergence of  
246 glycopeptides from the same protein. Some proteins with more than one glycosylated site, such as  
247 hemicentin-1, membralin and deoxyribonuclease-2-alpha, were detected only linked with the non-  
248 fucosylated high-mannose and hybrid type glycans, released by Endo-H. However, the majority of  
249 detected proteins with multiple glycosylated sites have differential N-glycan type profiles at each site for  
250 both the non-fucosylated (Fig. 4g, h) and fucosylated glycoproteins (Fig. 4i). Due to the massive  
251 expression of non-fucosylated high-mannose and hybrid type, distribution of non-fucosylated proteins  
252 was constricted to a small region (Fig. 4g, h), while the fucosylated glycoproteins were more widely  
253 distributed, based upon the quantitative information of six N-glycan types (Fig. 4i). We also compared  
254 the location of non-fucosylated and fucosylated glycoproteins and found that more than 60% of  
255 fucosylated proteins were located in the extracellular exosome while for non-fucosylated counterparts, it  
256 was 39.8% (Supplementary Fig. 14). That result indicates the N-linked core fucose may play significant  
257 roles in cell adhesion and molecular trafficking.

258 **Glycoproteins related with cancer.** We quantitatively detected some glycoproteins, previously  
259 reported to be related with cancers. Mannose-6-phosphate receptor (M6PR), for example, can regulate  
260 cell growth and motility, and it functions as a breast cancer suppressor<sup>35</sup>. We detected seven N-  
261 glycopeptides from that protein, which exhibited diverse structures on each site (Fig. 5). The  
262 glycopeptides with sequence MN#FTGGDTCHK, TN#ITLVCKPGDLESAPVLR,  
263 N#GSSIVDLSPLIHR had similar glycan type profiles, only expressing the non-fucosylated glycan on  
264 those sites. In addition, the ratio of non-fucosylated high mannose/hybrid type glycans are more than 77%  
265 in those three peptides. The glycopeptides with sequence MDGCTLTDEQLLYSFN#LSSLSTSTFK  
266 only expressed the core fucosylated complex glycan, which could only be released Endo-F3, not Endo-  
267 S, indicating that the glycan structures were all tri-antennary core fucosylated N-glycans. The  
268 glycopeptide with sequence TGPVVEDSGSLLEEVN#GSACTTSDGR had the most complex glycan  
269 profile, expressing both high mannose (14.9%) and fucosylated complex glycans (85.1%). The M6PR  
270 showed heterogeneity of glycan structure and distinctive glycan profiles on each of its glycopeptides.  
271 Through investigating the proportion of glycan types at each site, we could get a better understanding of  
272 the expression of this glycoprotein and its glycoprotein variants, which will promote our understanding  
273 of glycoprotein function in cancer.

## 274 **DISCUSSION**

275 The previously quantitative reports of glycoproteome generally focused on the difference of one  
276 specific structure at glycopeptides between samples. The distinctive characteristic of our research is that  
277 we could provide the relative proportion of N-glycan types on each glycopeptide, which indicate the  
278 activity and aberration expression of related glycotransferases. That novel quantitative strategy provides  
279 broad information on each glycosylated site, such as the ratio of high-mannose and core fucosylated  
280 glycan, the construction of bi/tri-antennary about the complex glycans. The specific types of glycan  
281 contribute important property of glycoproteins. For example, an antibody drug linked with high-mannose  
282 type glycan showed decreased complement activity and thermal stability<sup>36,37</sup>. However, it is challenging  
283 to detect the low abundance N-glycans, including the high-mannose and hybrid structures<sup>35</sup>. We can  
284 directly provide the proportion of high-mannose and hybrid structure with help of glycol-TQ strategy,  
285 which has potential to become the routine analysis strategy for pharmaceuticals. In addition, the  
286 increasing expression of the core fucosylated type on specific glycoprotein was as potential biomarkers  
287 in some cancers. For example, core fucosylation of  $\alpha$ -fetoprotein (AFP) L3 showed a significant increase

288 in samples from patients with hepatocellular carcinoma (HCC) than chronic hepatitis and liver cirrhosis,  
289 and so has been approved for the early detection of HCC<sup>19</sup>. Taking advantage of our method, we can  
290 provide not only the expression level of fucosylated AFP L3, but also the relative ratio between non-  
291 fucosylated and core fucosylated AFP L3. Combining both level of information maybe a more sensitive  
292 and specific strategy to investigate the fucosylated biomarker. Additionally, the proteomic method could  
293 simultaneously detect multiple potential glycoproteins from single analysis. In the area of anti-glycan  
294 drug development, the N-linked glycan of HIV-1 Env is the target for broadly neutralizing antibodies,  
295 therefore, routine analysis of glycan structure supports rational design and development of vaccine  
296 immunogens<sup>22</sup>. Our Glyco-TQ method makes it possible to quantitatively detect glycan types on each  
297 site of human immunodeficiency virus (HIV) envelope glycoprotein (Env) trimer without extensive  
298 purification. Therefore, our Glyco-TQ method has great potential in the area of biomarker research, anti-  
299 glycan drug development and fundamental biological research.

300 Our strategy used relatively mild-conditions and achieved high specificity through the biotin-avidin  
301 affinity chromatography. The high specificity was contributed: the strength of the biotin-avidin binding  
302 that allows us to extensively wash to remove non-specific peptides. As well, the photocleavable tag (PCt)  
303 added to the GalNAz has one amide group, all the glycopeptides should exist in charge state of 3+ or  
304 more. The 2+ non-specific peptides wouldn't be detected in the MS analysis, as we set the most abundant  
305 3+ to 6+ peptides for the MS/MS analysis in the data-dependent acquisition mode. Unlike other  
306 modifications, such as phosphorylation and acetylation, the diverse glycan structures on glycoproteins  
307 make their analyses extraordinarily challenging by MS. In order to comprehensively investigate  
308 glycosylation sites, introducing a common tag could provide convenience for glycopeptide confirmation.  
309 PNGase F is the most common enzyme used to hydrolyze the glycosylamine linkage between N-glycans  
310 and asparagine, introducing a universal mass tag (0.98 Da shift) as the asparagine residue is converted to  
311 aspartic acid. However, spontaneous non-enzymatic deamidation of asparagine residues significantly  
312 affect the accuracy of the N-linked glycosylation site determination<sup>38</sup>. In our enrichment strategy, all  
313 processed glycopeptides contained one unique glycan residue (GlcNAc-GalNAzPCt, 502.2 Da or Fuc-  
314 GlcNAc-GalNAzPCt, 648.2 Da). That common tag not only reduced the false identification of  
315 glycopeptides, but also distinguished the non-fucosylated and core fucosylated glycopeptide. For  
316 example, the peptide labeled with Fuc-GlcNAc-GalNAzPCt, 648.2 Da was only mapped to the N-  
317 glycopeptide with a core fucose. Moreover, the common tags on the glycopeptides will help us to identify

318 glycopeptide with atypical motifs and multiple glycosylated sites. One drawback in our research is that  
319 the HCD dissociation mode couldn't directly tell the glycosite of glycopeptides<sup>39</sup>. The glycan-peptide  
320 linkage is more labile than the amino acid linkages, which leads to the core GlcNAc residue first release  
321 from peptide rather than peptide dissociation under high HCD energy. Although the N-glycopeptide  
322 canonical sequon (N-X-T/S) would help us overcome most of interference of O-linked GlcNAc  
323 modifications, that problem could be further resolved by using the more advanced EThcD dissociation  
324 strategy, which would be able to locate the modified site from the MS/MS spectrum.

325 Site-specific intact glycopeptide methods provide information of the exact N-glycan structure on the  
326 glycopeptide, while, the intact glycopeptides generally have lower ionization efficiency, when compared  
327 with their peptide counterparts<sup>40</sup>. Heterogeneity of the glycan structures from the intact glycopeptide  
328 produces a number of sub-stoichiometric modifications, splitting MS signals of the same glycopeptide  
329 into a broad spectrum of ion species<sup>41</sup>. Thus, the intact glycopeptide method qualitatively detects the  
330 most abundance structures for a glycopeptide, while the information of minor glycan structure on the  
331 same glycopeptide will be ignored during the MS detection. On the contrary, using our novel Glyco-TQ  
332 methods, six type structures based on the N-glycan linkage and terminal from the glycopeptide were  
333 quantified by the intensity of MS signal. Therefore, site-specific intact glycopeptide detection and our  
334 Glyco-TQ method could become complementary strategies and come together to provide both qualitative  
335 and quantitative information, facilitating further understanding of the structure and function of  
336 glycoproteins. Finally, biologists could use our strategy to directly labeling their N-glycoproteins of  
337 interest. The GalNAz labeled glycoprotein could then be modified by PEG mass tag, resolved by SDS-  
338 PAGE and visualized through immunoblotting with antibodies<sup>42</sup>. That strategy would permit rapid  
339 quantitation of N-glycosylation levels of particular protein without need for purification or expensive  
340 instruments, such as MS.

341 In conclusion, we provide a chemoenzymatic method to quantify the glycan type on the glycoproteins.  
342 All the procedures were with mild-conditions and result showed high specificity of enrichment through  
343 affinity chromatography. We provide a new quantitative strategy based the glycan type, which allows us  
344 assess the micro-heterogeneity of glycoproteins. The Glyco-TQ method has potential to be used in broad  
345 areas, such as biomarker research, pharmaceuticals, and fundamental biological research.

346  
347

348 **Figure Legends**

349 **Fig. 1** The enrichment and quantitative strategy for N-glycoproteomics. **a** The workflow for the N-  
350 glycopeptide enrichment and quantitation. **b** Six N-glycan types of glycan structures linked on the  
351 glycopeptide: non-fucosylated high mannose/hybrid type, non-fucosylated bi-antennary, non-fucosylated  
352 tri-antennary, core fucosylated high mannose/hybrid type, core fucosylated bi-antennary, core  
353 fucosylated bi/tri-antennary type.

354 **Fig. 2** Quantitative analysis the standard glycoprotein IgG1 Fc using the Glyco-TQ method. **a**  
355 Purification of Fc fragment from human serum IgG1. **b** MALDI-MS detection the glycan profile of Fc  
356 fragments. **c** Quantitative investigation the proportion of Fc fragment glycopeptide, the MS profile of  
357 glycopeptide (up) and the corresponding extracted-ion chromatogram of glycopeptide. **d** Quantitative  
358 comparison of MALDI-MS method and Glyco-TQ method basing on the glycan type.

359 **Fig. 3** MS/MS spectrum of atypical motif glycopeptide with sequence ISVN#NVLPVFDNLMQQK. \*  
360 represents the b or y ions losing the glycan common tag. The neutral loss of fucose was shown between  
361 the parent ion at m/z 2608.2 and the fucose neutral loss-ion at m/z 2462.2. The oxonium ions from the  
362 common glycan tag was set as diagnostic ion peak, representing the fragment of GlcNAz at m/z 204.0,  
363 GalNAzCA at m/z 300.1 and GlcNAc-GalNAzPCt at m/z 503.2. The mass shift between b7 and b7\* (\*  
364 represent losing the common tag modification) is 618.3Da, which exactly the mass of the common glycan  
365 tag (Fuc-GlcNAc-GalNAzPCt).

366 **Fig. 4** Quantitative detection MCF 7 cell derived glycopeptides by the Glyco-TQ method. **a** Detection of  
367 the non-fucosylated glycopeptide based on the glycan type. **b** Detection of the core fucosylated  
368 glycopeptide based on the glycan type. **c** The different N-glycan type ratio of glycopeptide. **d** Quantitative  
369 detection of non-fucosylated glycopeptide. **e** Quantitative detection of both non-fucosylated and core  
370 fucosylated glycopeptide. **f** Quantitative detection of core fucosylated glycopeptide. Each row indicates  
371 one specific glycopeptide, and each column indicates the one type of glycan structure. The relative  
372 intensity of each glycan type on the glycopeptide was used for two-dimensional hierarchical clustering  
373 analysis. **g** The glycoprotein with two non-fucosylated glycosylation sites. **h** The glycoprotein with three  
374 or more non-fucosylated glycosylation sites. **i** The glycoprotein with two or more core fucosylated  
375 glycosylation sites, as the fucosylated glycopeptide includes non-fucosylated section and core  
376 fucosylated section: ● represents non-fucosylated section of core fucosylated glycopeptides, ●  
377 represents fucosylated section of core fucosylated glycopeptides. The distribution of each glycopeptide

378 on the Fig. 4g-i based on the relation ratio (%) of each N-glycan type. The glycopeptides from the same  
379 glycoprotein was linked together.

380 **Fig. 5** Quantitative analysis of glycosylation of mannose-6-phosphate receptor. # represents the  
381 glycosylated site.

382

383

384

385

386

387

388

389

390

391

392

393

394

395

396

Fig. 1

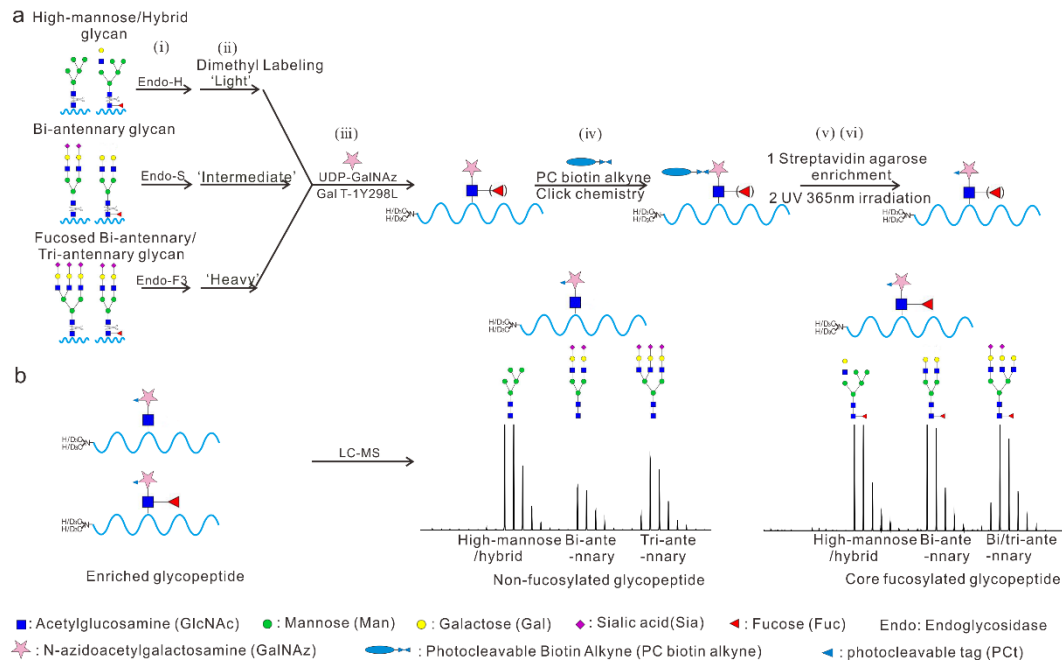

397

398

399

400

401

402

403

404

405

406

Fig. 2

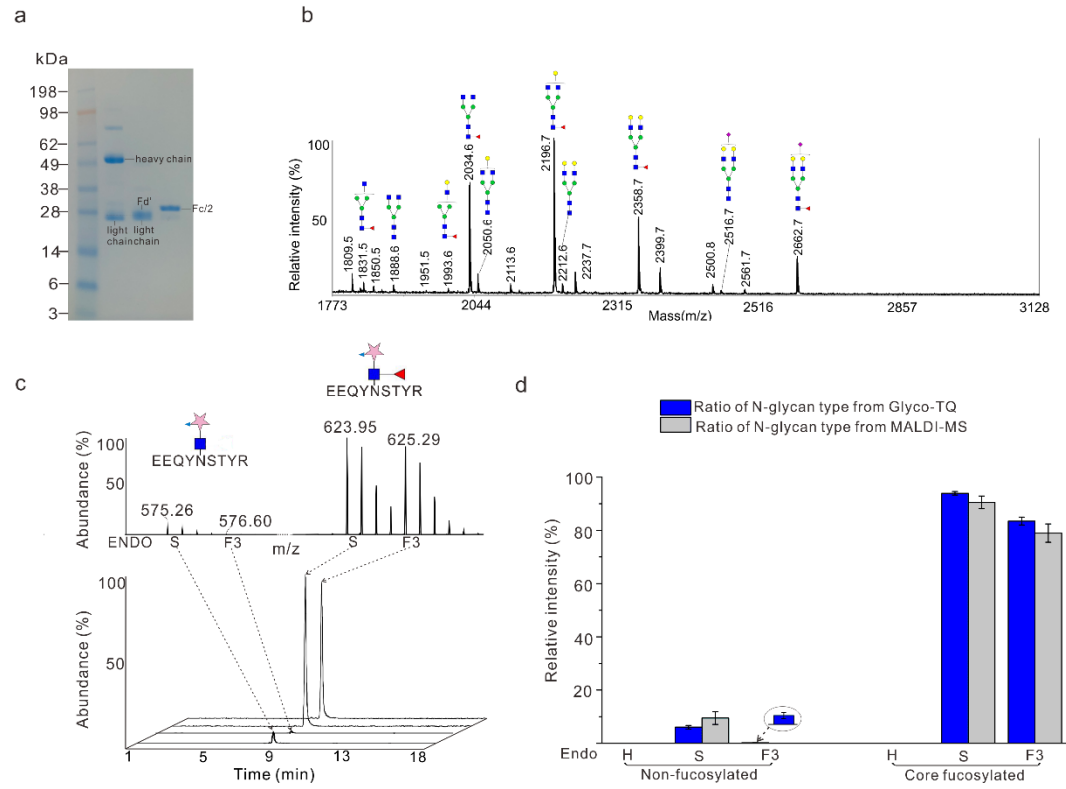

407

408

409

410

411

412

413

414



Fig. 3

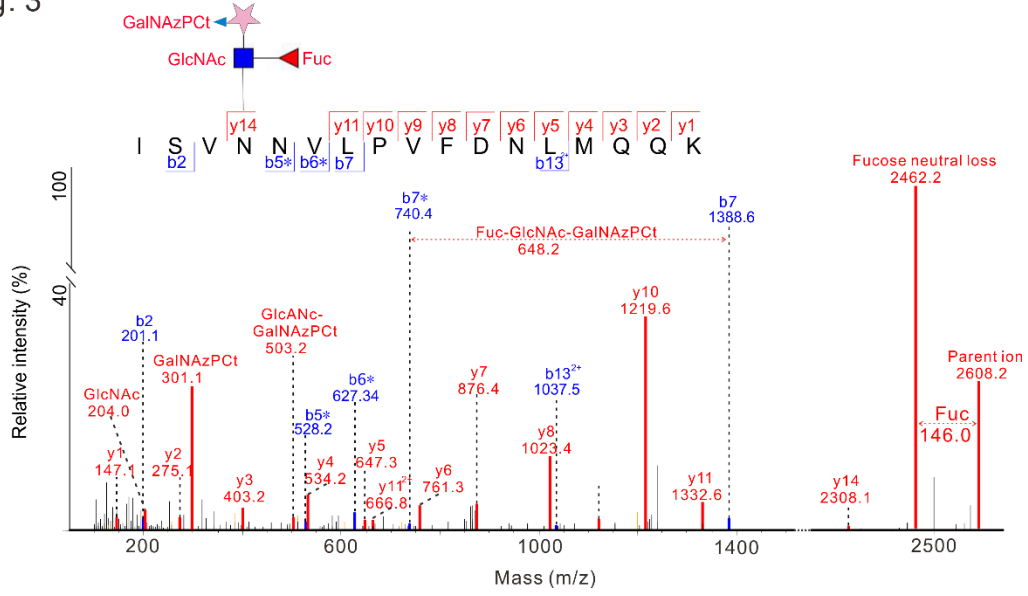

415

416

417

418

419

420

421

422

423

Fig. 4

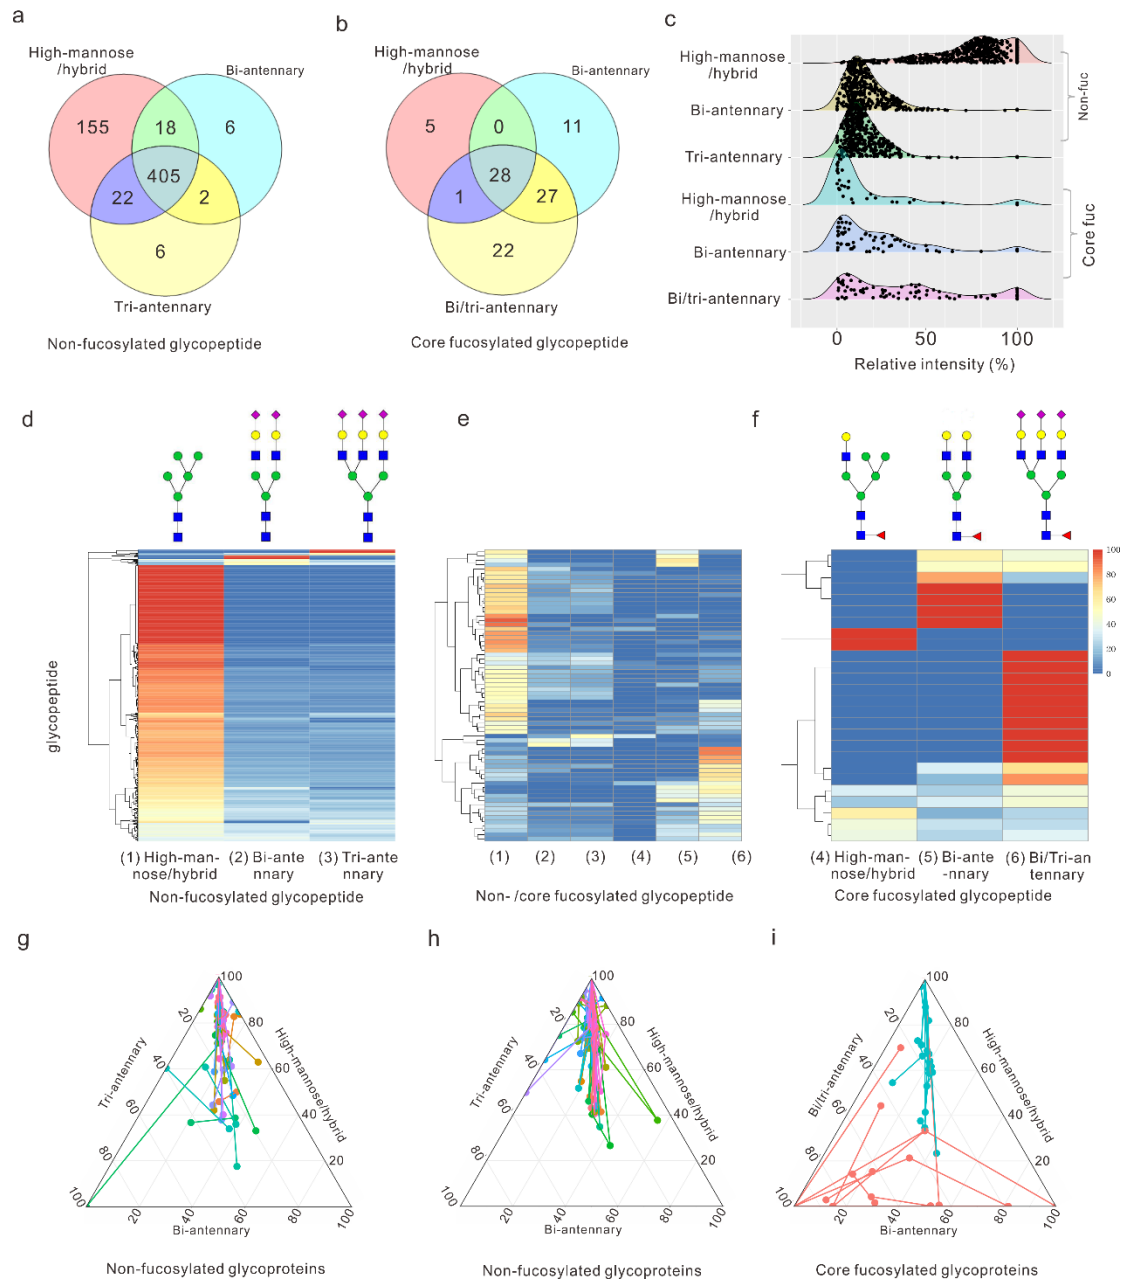

424

Fig. 5

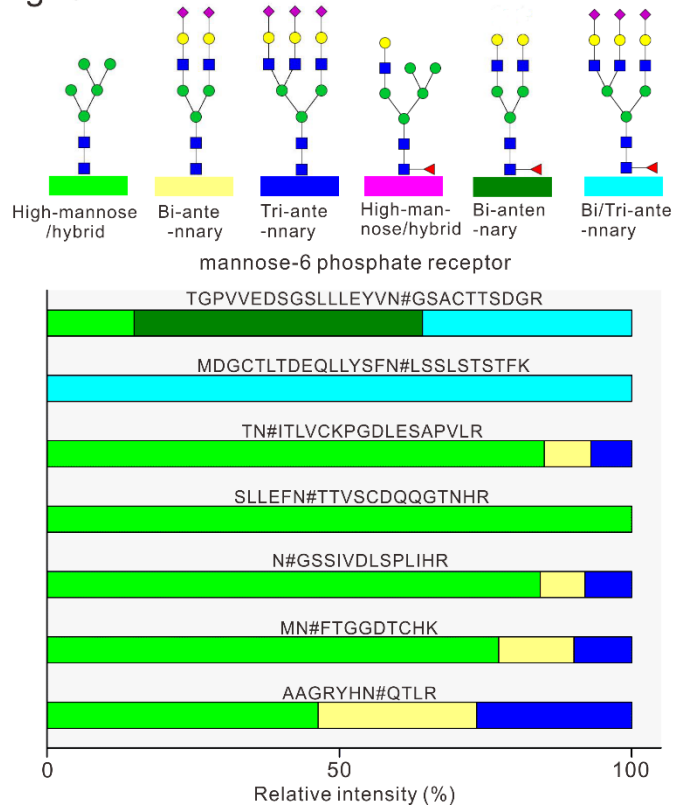

425

426

427

428

429

430

431

432

433

434

435

436

437

438

439

440

441

## 442 **METHODS**

### 443 **Materials**

444 Endoglycosidase S, F3, N-glycosidase F (PNGase F),  $\beta$ -N-Acetylhexosaminidase<sub>r</sub> and alkaline  
445 phosphatase were from New England Biolabs. Mutant  $\beta$ 1-4-Galactosyltransferase (Gal-T1 Y289L)  
446 and High Capacity Streptavidin Agarose were obtained from Thermo Scientific. IdeS protease was  
447 purchased from Promega. UDP-GalNAz was from chemily Glycoscience. The immunoglobulin G1  
448 (IgG1) from normal human plasma was obtained from Athens Research & Technology. 2-(4-  
449 ((bis((1-(tert-butyl)-1H-1,2,3-triazol-4-yl) methyl) amino) methyl)-1H-1,2,3-triazol-1-yl) acetic  
450 acid (BTAA), photocleavable biotin alkyne (PC biotin alkyne) were purchased from Click  
451 Chemistry Tools. EDTA-free protease inhibitor cocktail was obtained from Roche Diagnostics.  
452 RapiGest SF surfactant and the Sep-Pak tC18 cartridge was obtained from Waters. All other  
453 chemical materials, if not special highlighted, was obtained from Millipore Sigma.

### 454 **Preparing the standard glycoprotein**

455 Immunoglobulin G1 (100  $\mu$ g) was treated with 1000 units IdeS protease for 3 hours in 1X  
456 phosphate buffered solution (PBS, pH 7.6). 200  $\mu$ L of immobilized Protein A resin slurry (50%  
457 w/v) was added to the reaction buffer, and incubated with gentle mixing for 2 hours at room  
458 temperature. Then the Protein A resin slurry were transferred into centrifuge columns and Protein  
459 A resin was washed with 1XPBS three times to remove unbound F(ab')<sub>2</sub> fragments (fragment  
460 antigen-binding). The Fc fragments (fragment crystallizable region) of immunoglobulin G1 (IgG 1)  
461 were eluted with 100 mmol/L glycine buffer, pH 2-3. The Fc fragments were immediately  
462 neutralized with 1 M Tris-HCl buffer and stored in -80 °C for further use.

### 463 **Cell culture, protein extraction and protein digestion**

464 The MCF-7 cell line was obtained from American Type Culture Collection (ATCC). MCF-7  
465 cells were maintained in advanced MEM media (Gibco) with 10% (v/v) FBS, 1X GlutaMAX  
466 (Gibco), and 2.8  $\mu$ g/mL Gentamicin (Gibco). The cells were cultured at 37 °C and 5% CO<sub>2</sub>. Once  
467 the cells reached 80% confluency, cells were harvested in the ice-cold RIPA buffer (50 mM HEPES  
468 pH 7.6, 150mM NaCl, 1% NP-40, 1% sodium deoxycholate, 0.1% sodium dodecyl sulfate (SDS)  
469 and protease inhibitor cocktail (CompleteMini, Roche)) by scraping. Cell lysates were subjected to  
470 ultrasonic (10 s process with 10 s interval for 1 min) on ice using a Q125 Sonicator with 50%  
471 amplitude. The cell debris was removed through centrifugation at 16000g, 4 °C, 10 min. The protein

472 in the supernatant was precipitated using 6-fold volume ice cold acetone overnight at -20 °C.  
473 Protein was pelleted by centrifugation at 16000g, 4 °C, 10 min and washed with the ice-cold acetone  
474 two times. For the in-solution trypsin digestion, the procedure was performed as the previously  
475 report<sup>43</sup>. Briefly, the resulting protein was dissolved in 50 mM ammonium bicarbonate and 8 M  
476 urea solution, reduced in 5 mM dithiothreitol (DTT) (56 °C, 30 min), and alkylated by with 10 mM  
477 iodoacetamide (25 °C, 40 min in the dark). Cell proteins were digested with the protein: trypsin  
478 (Worthington Biochemical Corp) at ratio, 50:1, in 50 mM ammonium bicarbonate, 1M urea solution  
479 pH 7.8 at 37 °C for 20 hours. After the digest, the solution was acidified (pH 2-3) by 0.5% formic  
480 acid and centrifuged to remove the debris, the supernatant was collected and peptide was desalted  
481 by Sep-Pak tC18 cartridge (Waters). The peptide elution was dried by SpeedVac concentrator  
482 (Thermo Scientific).

#### 483 **Endoglycosidases digestion and dimethyl labeling**

484 To leave one N-acetylglucosamine for high mannose linked N-peptide, peptide from 1 mg protein was  
485 parallelly digested with 0.05 U Endo-H (sigma) in the 50 mM sodium acetate buffer, pH 6; 2000 units  
486 Endo-S (NEB) for biantennary N-glycan in 50 mM sodium acetate, 5 mM calcium chloride buffer pH  
487 5.5; 100 units Endo-F3 (NEB) in 50 mM sodium acetate, pH 4.5, for 24 hours respectively. After the  
488 endoglycosidase were denatured at 95 °C, 5 min,  $\beta$ -N-acetylhexosaminidase<sub>f</sub> was added to remove O-  
489 GlcNAc for another 8 hours. After desalted by Sep-Pak tC18 cartridge, the peptide was adjusted to pH 6  
490 with HEPES buffer. For isotope dimethyl labeling, the peptides were treated with 10  $\mu$ L 20% (v/v)  
491 CH<sub>2</sub>O, 15 $\mu$ L 3M NaBH<sub>3</sub>CN for the Endo-H treated sample; 10  $\mu$ L 20% (v/v) CD<sub>2</sub>O, 10  $\mu$ L 3M NaBH<sub>3</sub>CN  
492 for the Endo-S treated sample; 15  $\mu$ L 20% (v/v) CD<sub>2</sub>O, 15 $\mu$ L 3M NaBD<sub>3</sub>CN for the Endo-F3 treated  
493 sample, at 25 °C for 45 min with mixing. The reaction was quenched by adding 10  $\mu$ L 20% (v/v) ammonia  
494 solution, combined, purified by Sep-Pak cartridge, and dried by Speedvac.

#### 495 **Glycopeptide enrichment**

496 All the peptide was resuspended in the HEPES buffer (pH 7.9) containing 5 mM Zn<sup>2+</sup>, 2  $\mu$ L  
497 phosphatase, 10  $\mu$ L GalT1 T298L/1 mg peptide, and 25  $\mu$ g UDP-GalNAz/1 mg peptide, incubated in 4  
498 °C for 24 hours. Excess UDP-GalNAz was remove by Sap-pak C18 cartridge. The peptide was dried in  
499 the speedVac and resuspended the PBS buffer. The Copper(I)-catalyzed Azide-Alkyne Cycloaddition  
500 (CuAAC) reaction reagents (25 nmol PC biotin alkyne, 300  $\mu$ M CuSO<sub>4</sub>, 600  $\mu$ M BTAA, 1.50 mM  
501 sodium ascorbate) was mixed with the GalNAz labeled peptide and the reaction was incubated for 3 h at

502 25 °C. 200 µL high capacity streptavidin agarose resin was add to the mixture and incubate overnight at  
503 4 °C. The beads were extensively washed with 2M urea ten times, 1XPBS buffer (pH 7.6) ten times and  
504 20% (v/v) acetonitrile (ACN) ten times. The beads were then resuspended in 50% (v/v) ACN, transferred  
505 to clear thin-walled polymerase chain reaction (PCR) tubes, and illuminated by 365 nm UV (VWR  
506 transilluminator, LM-20E) for 30 min at 4 °C with gentle mixing. The supernatant from each fraction  
507 was collected, lyophilized, and stored at -20°C.

#### 508 **Mass spectrometry analysis**

509 Glycopeptides were analyzed by an Eksigent nanoLC liquid chromatograph that was connected in-  
510 line with an Q Exactive HF-X MS. The separation of peptides was performed on an analytical column  
511 (75 µm × 50 cm) packed with reverse phase beads (1.9 µm; 120-Å pore size; Dr. Maisch GmbH) with 2-  
512 hour gradient from 5 to 35% acetonitrile (v/v) at a flow rate of 200 nl/min. The full scan mass spectrums  
513 were acquired over range 300-1800 (m/z) with the mass resolution setting 70000 at m/z 400. Maximum  
514 injection time 100 ms; AGC target value 1e6. The 12 most intense ions were selected for tandem mass  
515 spectrometry detection with the following parameters: collision energy, 30%; exclusion ions charge 1, 2,  
516 7, 8, >8; resolution 17500, AGC target 1e5; maximum injection time 120 ms.

#### 517 **Data analysis**

518 The raw data were processed using the MaxQuant software and searched against with UniProt human  
519 database containing all proteins in the UniProt Human (Homo sapiens) database (20190802). The general  
520 parameters were performed during the search: 10 ppm precursor mass tolerances; digested with trypsin;  
521 two max missed cleavages; fixed modifications: carbamidomethylation of cysteine (+57.0214); variable  
522 modifications: oxidation of methionine (+15.9949). The common tag was also performed as variable  
523 modifications: modified amino acid, asparagine (N); composition  $H_{30}C_{19}N_6O_{10}$ , GlcNAc-GalNAz-  
524 photocleavable tag (GlcNAc-GalNAzPCt), 502.2023 Da; neutral losses, GlcNAc-GalNAzPCt,  
525 GalNAzPCt  $H_{17}C_{11}N_5O_5$ ; diagnostic peaks, GalNAzPCt  $H_{17}C_{11}N_5O_5$ , GlcNAc  $H_{13}C_8NO_5$ , GlcNAc-  
526 GalNAzPCt. If the N-glycopeptide was modified with core fucose, fucosylated linked was performed as  
527 variable modifications as following: modified amino acid, asparagine (N); composition  $H_{40}C_{25}N_6O_{14}$ ,  
528 Fuc-GlcNAc-GalNAzPCt, 648.2602 Da; neutral losses, Fuc  $H_{10}C_6O_4$ , Fuc-GlcNAc-GalNAzPCt,  
529 GalNAzPCt, Fuc+GalNAzPCt  $H_{27}C_{17}N_5O_9$ ; diagnostic peaks, GalNAzPCt, GlcNAc, Fuc, GlcNAc-  
530 GalNAzPCt, Fuc-GlcNAc-GalNAzPCt and Fuc-GlaNAzPCt  $H_{23}C_{14}NO_9$ .

531

532 **Acknowledgements**

533 This work was supported by the Government of Canada through Genome Canada and the Ontario  
534 Genomics Institute (OGI-114), CIHR grant (ECD-144627), the Natural Sciences and Engineering  
535 Research Council of Canada (NSERC, grant no. 210034), the Ontario Ministry of Economic  
536 Development and Innovation (REG1-4450) and The University of Ottawa. DF acknowledges a  
537 Distinguished Research Chair from the University of Ottawa.

538 **Authors' contributions**

539 D.F., J.L, and H.L. designed the study. H.L., L.L, K.C and K.W performed the experiments and data  
540 analysis. R.C and S.T involved in discussion of the study design. D.F., J.L, H.L., X.Z, Z.N and J.M. wrote  
541 the manuscript. All authors participated in the data interpretation, discussion and edits of the manuscript.

542 **Competing interests**

543 D.F. was co-founded Biotagenics and MedBiome, clinical microbiomics companies. The remaining  
544 authors declare no competing interests.

545

546

547

548

549

550

551

552

553

554

555

556

557

558

559

560

561

562 **REFERENCE**

- 563 (1) Ohtsubo, K.; Marth, J. D. Glycosylation in cellular mechanisms of health and disease. *Cell* **2006**,  
564 *126* (5), 855.
- 565 (2) Stanley, P.; Taniguchi, N.; Aebi, M. In *Essentials of Glycobiology*; Varki, A.; Cummings, R.  
566 D.; Esko, J. D.; Stanley, P.; Hart, G. W.; Aebi, M.; Darvill, A. G.; Kinoshita, T.; Packer, N. H. et al., Eds.  
567 Cold Spring Harbor (NY), 2015, DOI:10.1101/glycobiology.3e.009 10.1101/glycobiology.3e.009.
- 568 (3) Hebert, D. N.; Lamriben, L.; Powers, E. T.; Kelly, J. W. The intrinsic and extrinsic effects of N-  
569 linked glycans on glycoproteostasis. *Nature chemical biology* **2014**, *10* (11), 902.
- 570 (4) Gagneux, P.; Varki, A. Evolutionary considerations in relating oligosaccharide diversity to  
571 biological function. *Glycobiology* **1999**, *9* (8), 747.
- 572 (5) Zielinska, D. F.; Gnad, F.; Wisniewski, J. R.; Mann, M. Precision mapping of an in vivo N-  
573 glycoproteome reveals rigid topological and sequence constraints. *Cell* **2010**, *141* (5), 897.
- 574 (6) Wollscheid, B.; Bausch-Fluck, D.; Henderson, C.; O'Brien, R.; Bibel, M.; Schiess, R.; Aebersold,  
575 R.; Watts, J. D. Mass-spectrometric identification and relative quantification of N-linked cell  
576 surface glycoproteins. *Nature biotechnology* **2009**, *27* (4), 378.
- 577 (7) Zhang, H.; Li, X. J.; Martin, D. B.; Aebersold, R. Identification and quantification of N-linked  
578 glycoproteins using hydrazide chemistry, stable isotope labeling and mass spectrometry.  
579 *Nature biotechnology* **2003**, *21* (6), 660.
- 580 (8) Xiao, H.; Chen, W.; Smeekens, J. M.; Wu, R. An enrichment method based on synergistic and  
581 reversible covalent interactions for large-scale analysis of glycoproteins. *Nature*  
582 *communications* **2018**, *9* (1), 1692.
- 583 (9) Myslting, S.; Palmisano, G.; Hojrup, P.; Thaysen-Andersen, M. Utilizing ion-pairing hydrophilic  
584 interaction chromatography solid phase extraction for efficient glycopeptide enrichment in  
585 glycoproteomics. *Analytical chemistry* **2010**, *82* (13), 5598.
- 586 (10) Woo, C. M.; Iavarone, A. T.; Spicciarich, D. R.; Palaniappan, K. K.; Bertozzi, C. R. Isotope-targeted  
587 glycoproteomics (IsoTaG): a mass-independent platform for intact N- and O-glycopeptide  
588 discovery and analysis. *Nature methods* **2015**, *12* (6), 561.
- 589 (11) Xiao, H.; Wu, R. Quantitative investigation of human cell surface N-glycoprotein dynamics.  
590 *Chemical science* **2017**, *8* (1), 268.
- 591 (12) Sun, S.; Shah, P.; Eshghi, S. T.; Yang, W.; Trikanad, N.; Yang, S.; Chen, L.; Aiyetan, P.; Hoti, N.;  
592 Zhang, Z. et al. Comprehensive analysis of protein glycosylation by solid-phase extraction of N-  
593 linked glycans and glycosite-containing peptides. *Nature biotechnology* **2016**, *34* (1), 84.
- 594 (13) Riley, N. M.; Hebert, A. S.; Westphall, M. S.; Coon, J. J. Capturing site-specific heterogeneity  
595 with large-scale N-glycoproteome analysis. *Nature communications* **2019**, *10* (1), 1311.
- 596 (14) Liu, M. Q.; Zeng, W. F.; Fang, P.; Cao, W. Q.; Liu, C.; Yan, G. Q.; Zhang, Y.; Peng, C.; Wu, J. Q.;  
597 Zhang, X. J. et al. pGlyco 2.0 enables precision N-glycoproteomics with comprehensive quality  
598 control and one-step mass spectrometry for intact glycopeptide identification. *Nature*  
599 *communications* **2017**, *8* (1), 438.
- 600 (15) Stadlmann, J.; Taubenschmid, J.; Wenzel, D.; Gattinger, A.; Durnberger, G.; Dusberger, F.; Elling,  
601 U.; Mach, L.; Mechtler, K.; Penninger, J. M. Comparative glycoproteomics of stem cells identifies  
602 new players in ricin toxicity. *Nature* **2017**, *549* (7673), 538.
- 603 (16) Mayampurath, A.; Song, E.; Mathur, A.; Yu, C. Y.; Hammoud, Z.; Mechref, Y.; Tang, H. Label-free  
604 glycopeptide quantification for biomarker discovery in human sera. *Journal of proteome*  
605 *research* **2014**, *13* (11), 4821.



- 606 (17) Pinho, S. S.; Reis, C. A. Glycosylation in cancer: mechanisms and clinical implications. *Nature*  
607 *reviews. Cancer* **2015**, *15* (9), 540.
- 608 (18) Rodriguez, E.; Schetters, S. T. T.; van Kooyk, Y. The tumour glyco-code as a novel immune  
609 checkpoint for immunotherapy. *Nat Rev Immunol* **2018**, *18* (3), 204.
- 610 (19) Sato, Y.; Nakata, K.; Kato, Y.; Shima, M.; Ishii, N.; Koji, T.; Taketa, K.; Endo, Y.; Nagataki, S. Early  
611 recognition of hepatocellular carcinoma based on altered profiles of alpha-fetoprotein. *The*  
612 *New England journal of medicine* **1993**, *328* (25), 1802.
- 613 (20) Liu, Y. C.; Yen, H. Y.; Chen, C. Y.; Chen, C. H.; Cheng, P. F.; Juan, Y. H.; Chen, C. H.; Khoo, K. H.; Yu,  
614 C. J.; Yang, P. C. et al. Sialylation and fucosylation of epidermal growth factor receptor suppress  
615 its dimerization and activation in lung cancer cells. *Proceedings of the National Academy of*  
616 *Sciences of the United States of America* **2011**, *108* (28), 11332.
- 617 (21) Potapenko, I. O.; Haakensen, V. D.; Luders, T.; Helland, A.; Bukholm, I.; Sorlie, T.; Kristensen, V.  
618 N.; Lingjaerde, O. C.; Borresen-Dale, A. L. Glycan gene expression signatures in normal and  
619 malignant breast tissue; possible role in diagnosis and progression. *Molecular oncology* **2010**,  
620 *4* (2), 98.
- 621 (22) Cao, L.; Diedrich, J. K.; Kulp, D. W.; Pauthner, M.; He, L.; Park, S. R.; Sok, D.; Su, C. Y.; Delahunty,  
622 C. M.; Menis, S. et al. Global site-specific N-glycosylation analysis of HIV envelope glycoprotein.  
623 *Nature communications* **2017**, *8*, 14954.
- 624 (23) Unione, L.; Lenza, M. P.; Arda, A.; Urquiza, P.; Lain, A.; Falcon-Perez, J. M.; Jimenez-Barbero, J.;  
625 Millet, O. Glycoprotein Analysis of an Intact Glycoprotein As Inferred by NMR Spectroscopy. *ACS*  
626 *central science* **2019**, *5* (9), 1554.
- 627 (24) Maley, F.; Trimble, R. B.; Tarentino, A. L.; Plummer, T. H. Characterization of Glycoproteins and  
628 Their Associated Oligosaccharides through the Use of Endoglycosidases. *Anal Biochem* **1989**,  
629 *180* (2), 195.
- 630 (25) Collin, M.; Olsen, A. EndoS, a novel secreted protein from *Streptococcus pyogenes* with  
631 endoglycosidase activity on human IgG. *Embo J* **2001**, *20* (12), 3046.
- 632 (26) Trimble, R. B.; Tarentino, A. L. Identification of Distinct Endoglycosidase (Endo) Activities in  
633 *Flavobacterium-Meningosepticum* - Endo-F1, Endo-F2, and Endo-F3 - Endo-F1 and Endo-H  
634 Hydrolyze Only High Mannose and Hybrid Glycans. *J Biol Chem* **1991**, *266* (3), 1646.
- 635 (27) Clark, P. M.; Dweck, J. F.; Mason, D. E.; Hart, C. R.; Buck, S. B.; Peters, E. C.; Agnew, B. J.; Hsieh-  
636 Wilson, L. C. Direct in-gel fluorescence detection and cellular imaging of O-GlcNAc-modified  
637 proteins. *Journal of the American Chemical Society* **2008**, *130* (35), 11576.
- 638 (28) Szychowski, J.; Mahdavi, A.; Hodas, J. J.; Bagert, J. D.; Ngo, J. T.; Landgraf, P.; Dieterich, D. C.;  
639 Schuman, E. M.; Tirrell, D. A. Cleavable biotin probes for labeling of biomolecules via azide-  
640 alkyne cycloaddition. *Journal of the American Chemical Society* **2010**, *132* (51), 18351.
- 641 (29) Arnold, J. N.; Wormald, M. R.; Sim, R. B.; Rudd, P. M.; Dwek, R. A. The impact of glycosylation  
642 on the biological function and structure of human immunoglobulins. *Annual review of*  
643 *immunology* **2007**, *25*, 21.
- 644 (30) Tarentino, A. L.; Plummer, T. H., Jr. Enzymatic deglycosylation of asparagine-linked glycans:  
645 purification, properties, and specificity of oligosaccharide-cleaving enzymes from  
646 *Flavobacterium meningosepticum*. *Methods in enzymology* **1994**, *230*, 44.
- 647 (31) Huang, C. C.; Harada, Y.; Hosomi, A.; Masahara-Negishi, Y.; Seino, J.; Fujihira, H.; Funakoshi, Y.;  
648 Suzuki, T.; Dohmae, N.; Suzuki, T. Endo-beta-N-acetylglucosaminidase forms N-GlcNAc protein  
649 aggregates during ER-associated degradation in Ngly1-defective cells. *Proceedings of the*

- 650 *National Academy of Sciences of the United States of America* **2015**, *112* (5), 1398.
- 651 (32) Khatri, K.; Pu, Y.; Klein, J. A.; Wei, J.; Costello, C. E.; Lin, C.; Zaia, J. Comparison of Collisional and  
652 Electron-Based Dissociation Modes for Middle-Down Analysis of Multiply Glycosylated  
653 Peptides. *Journal of the American Society for Mass Spectrometry* **2018**, *29* (6), 1075.
- 654 (33) Hamouda, H.; Kaup, M.; Ullah, M.; Berger, M.; Sandig, V.; Tauber, R.; Blanchard, V. Rapid  
655 analysis of cell surface N-glycosylation from living cells using mass spectrometry. *Journal of*  
656 *proteome research* **2014**, *13* (12), 6144.
- 657 (34) Moremen, K. W.; Tiemeyer, M.; Nairn, A. V. Vertebrate protein glycosylation: diversity, synthesis  
658 and function. *Nature reviews. Molecular cell biology* **2012**, *13* (7), 448.
- 659 (35) Oates, A. J.; Schumaker, L. M.; Jenkins, S. B.; Pearce, A. A.; DaCosta, S. A.; Arun, B.; Ellis, M. J.  
660 The mannose 6-phosphate/insulin-like growth factor 2 receptor (M6P/IGF2R), a putative breast  
661 tumor suppressor gene. *Breast cancer research and treatment* **1998**, *47* (3), 269.
- 662 (36) Ponniah, G.; Nowak, C.; Gonzalez, N.; Miano, D.; Liu, H. Detection and quantitation of low  
663 abundance oligosaccharides in recombinant monoclonal antibodies. *Analytical chemistry* **2015**,  
664 *87* (5), 2718.
- 665 (37) Zheng, K.; Yarmarkovich, M.; Bantog, C.; Bayer, R.; Patapoff, T. W. Influence of glycosylation  
666 pattern on the molecular properties of monoclonal antibodies. *mAbs* **2014**, *6* (3), 649.
- 667 (38) Rivers, J.; McDonald, L.; Edwards, I. J.; Beynon, R. J. Asparagine deamidation and the role of  
668 higher order protein structure. *Journal of proteome research* **2008**, *7* (3), 921.
- 669 (39) Hu, H.; Khatri, K.; Klein, J.; Leymarie, N.; Zaia, J. A review of methods for interpretation of  
670 glycopeptide tandem mass spectral data. *Glycoconjugate journal* **2016**, *33* (3), 285.
- 671 (40) Stavenhagen, K.; Hinneburg, H.; Thaysen-Andersen, M.; Hartmann, L.; Varon Silva, D.; Fuchser,  
672 J.; Kaspar, S.; Rapp, E.; Seeberger, P. H.; Kolarich, D. Quantitative mapping of glycoprotein  
673 micro-heterogeneity and macro-heterogeneity: an evaluation of mass spectrometry signal  
674 strengths using synthetic peptides and glycopeptides. *Journal of mass spectrometry : JMS* **2013**,  
675 *48* (6), i.
- 676 (41) Marx, V. Metabolism: sweeter paths in glycoscience. *Nature methods* **2017**, *14* (7), 667.
- 677 (42) Rexach, J. E.; Rogers, C. J.; Yu, S. H.; Tao, J.; Sun, Y. E.; Hsieh-Wilson, L. C. Quantification of O-  
678 glycosylation stoichiometry and dynamics using resolvable mass tags. *Nature chemical biology*  
679 **2010**, *6* (9), 645.
- 680 (43) Li, L.; Abou-Samra, E.; Ning, Z.; Zhang, X.; Mayne, J.; Wang, J.; Cheng, K.; Walker, K.; Stintzi, A.;  
681 Figeys, D. An in vitro model maintaining taxon-specific functional activities of the gut  
682 microbiome. *Nature communications* **2019**, *10* (1), 4146.

683

684
